# Supplementary material for: Combined staurosporine and retinoic acid induces differentiation in retinoic acid resistant acute promyelocytic leukemia cell lines
Source: PubMed Central journal article supplement — Sci Rep. 2014 Apr 28;4:4821. doi: 10.1038/srep04821 (PMC4001092; doi:10.1038/srep04821), 2014-04-28
Supplement: srep04821-s1.pdf [file srep04821-s1.pdf]

## **Supplementary information**

### **Combined staurosporine and retinoic acid induces differentiation in retinoic acid resistant acute promyelocytic leukemia cell lines**

Dong-zheng Ge<sup>1,2</sup>, Yan Sheng<sup>1</sup>, Xun Cai<sup>1</sup>

<sup>1</sup>Shanghai Institute of Hematology and State Key Laboratory of Medical Genomics, Rui-jin Hospital, Shanghai Jiao Tong University School of Medicine, Shanghai 200025, China; <sup>2</sup>Department of Hematology, Peace Hospital of Changzhi Medical Colledge, Changzhi 046000, China.

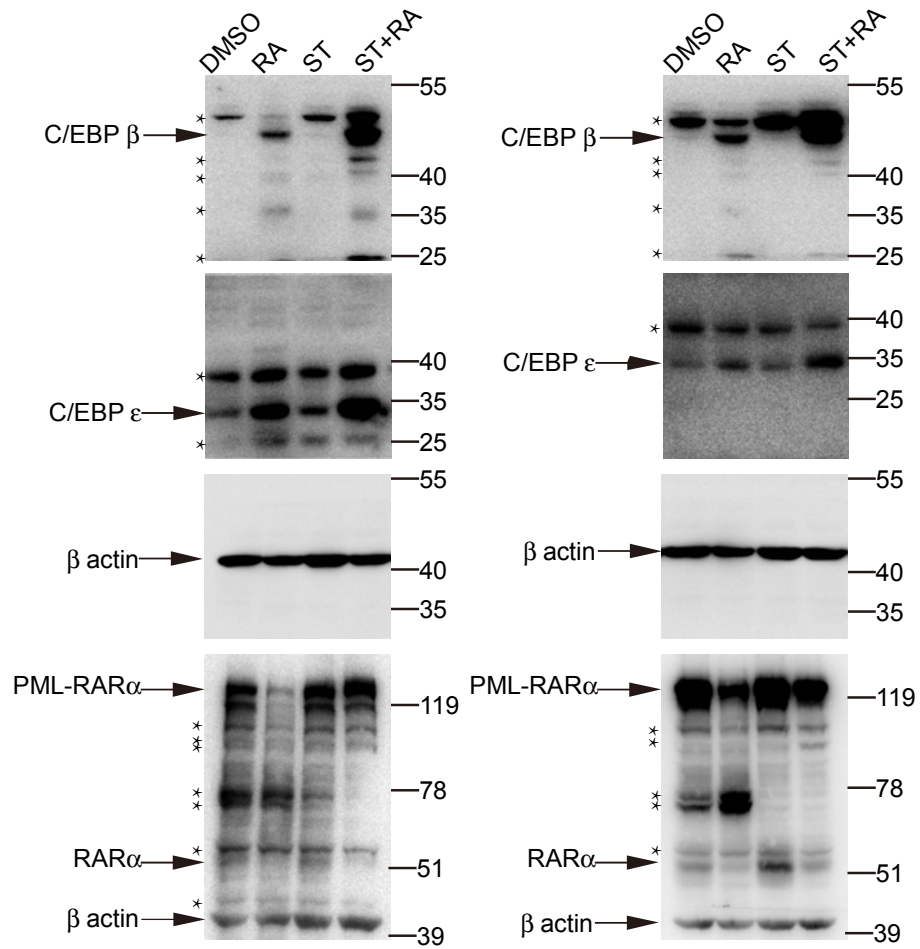

### Supplemental Figure S1.

Full size blots of the immunoblot detection shown in Figure 2. The left panel were full size blots of NB4-R1 cells, the right panel were those of NB4-R2 cells.\* indicates non-specific bands.  $\beta$ -actin was probed in the same membrane of PML-RAR $\alpha$ .

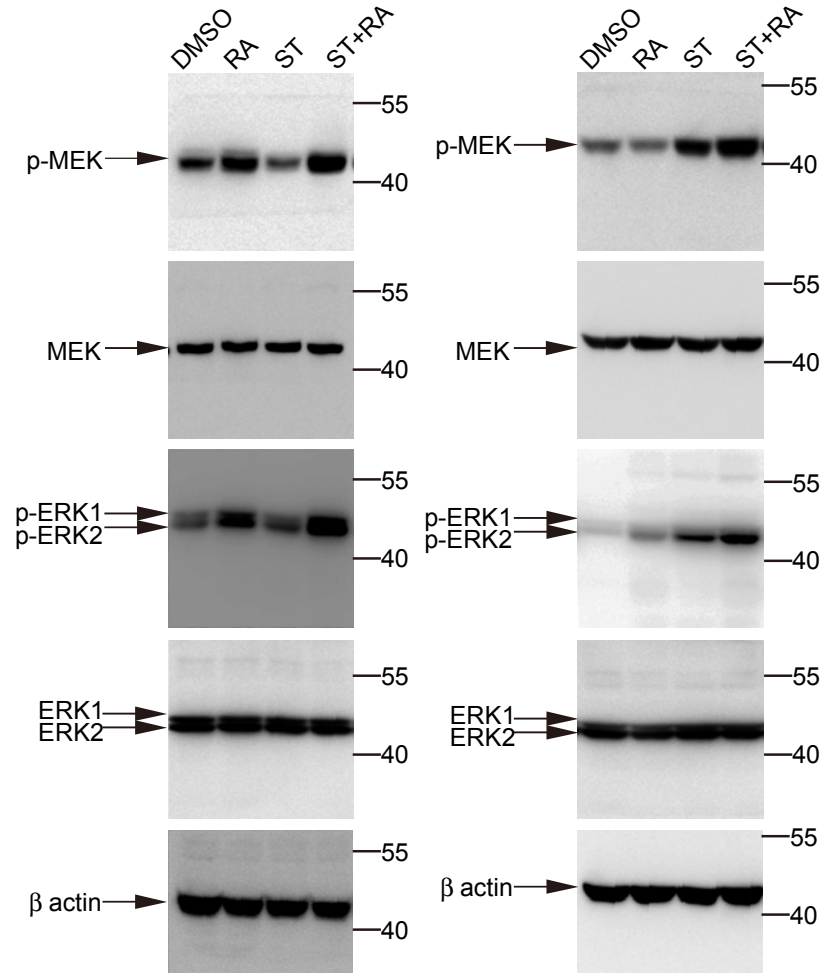

Supplemental Figure S1 ( continued ) .

Full size blots of the immunoblot detection shown in Figure 2. The left panel were full size blots of NB4-R1 cells, the right panel were those of NB4-R2 cells.

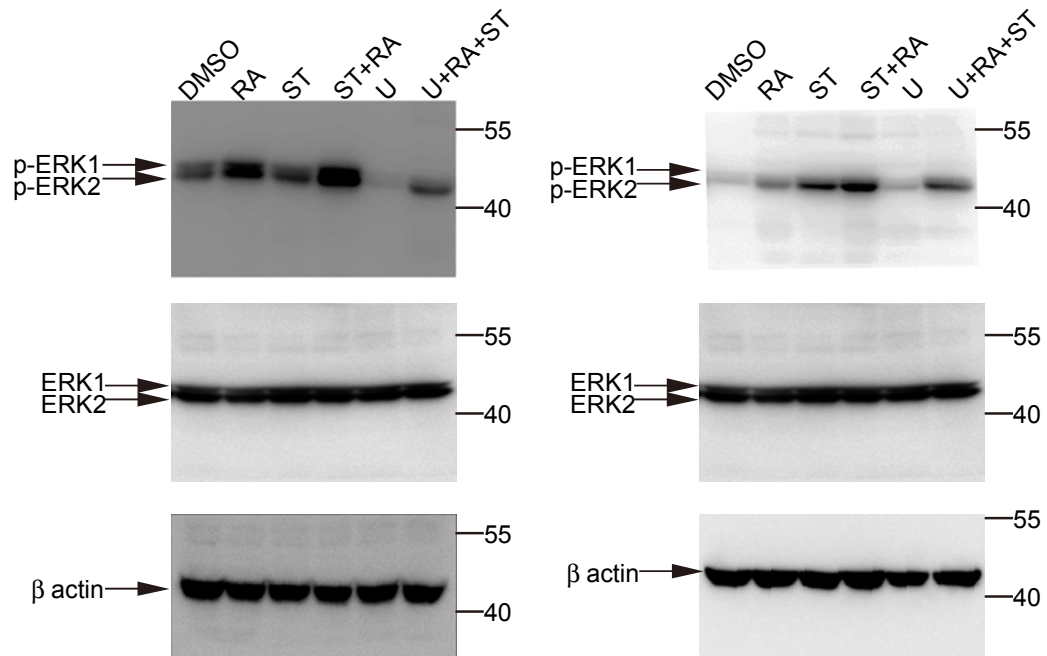

Supplemental Figure S2.

Full size blots of the immunoblot detection shown in Figure 3. The left panel were full size blots of NB4-R1 cells, the right panel were those of NB4-R2 cells.

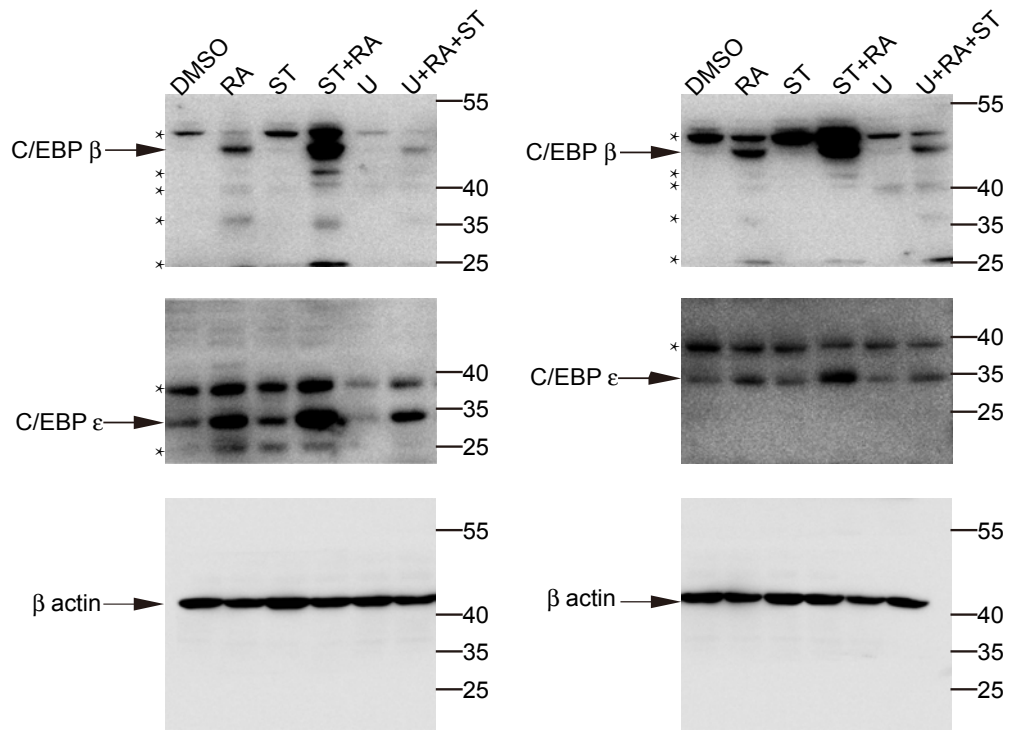

### Supplemental Figure S3.

Full size blots of the immunoblot detection shown in Figure 4. The left panel were full size blots of NB4-R1 cells, the rightpanel were those of NB4-R2 cells.\* indicates non-specific bands.
